# Supplementary material for: Predicting Renal Denervation Response in Resistant High Blood Pressure by Arterial Stiffness Assessment: A Systematic Review
Source: J Clin Med. 2022 Aug 18;11(16):4837. doi: 10.3390/jcm11164837 (PMC9410368; doi:10.3390/jcm11164837)
Supplement: Supplementary file 1 [file jcm-11-04837-s001.zip › Table S2 Quality assessment.pdf]

**Table S2.** Quality assessment of included studies using Newcastle-Ottawa scale.

| Study         | Representativeness of the exposed cohort | Selection of the non-exposed cohort | Ascertainment of exposure | Presence of outcome of interest at the start | Comparability of cohorts | Assessment of outcome | Follow-up long enough for outcomes to occur | Adequacy of follow-up | Total |
|---------------|------------------------------------------|-------------------------------------|---------------------------|----------------------------------------------|--------------------------|-----------------------|---------------------------------------------|-----------------------|-------|
| Ott, 2015     | *                                        | *                                   | *                         | *                                            | *                        |                       | *                                           |                       | 6     |
| Okon, 2016    | *                                        | *                                   | *                         | *                                            | *                        | *                     | *                                           | *                     | 8     |
| Fengler, 2017 | *                                        | *                                   | *                         | *                                            | *                        |                       | *                                           |                       | 6     |
| Fengler, 2018 | *                                        | *                                   | *                         | *                                            | *                        | *                     | *                                           |                       | 7     |
| Fengler, 2022 | *                                        | *                                   | *                         | *                                            | *                        | *                     | *                                           | *                     | 8     |
| Fengler, 2018 | *                                        | *                                   | *                         | *                                            | *                        |                       | *                                           | *                     | 7     |
| Sata, 2018    | *                                        | *                                   | *                         | *                                            | *                        |                       | *                                           |                       | 6     |
| Stoiber, 2018 | *                                        | *                                   | *                         | *                                            | *                        |                       | *                                           | *                     | 7     |

Good quality: 3 or 4 stars in selection domain AND 1 or 2 stars in comparability domain AND 2 or 3 stars in outcome/exposure domain. Fair quality: 2 stars in selection domain AND 1 or 2 stars in comparability domain AND 2 or 3 stars in outcome/exposure domain. Poor quality: 0 or 1 star in selection domain OR 0 stars in comparability domain OR 0 or 1 stars in outcome/exposure domain.
